# Supplementary material for: Abrogation of collagen-induced arthritis by a peptidyl arginine deiminase inhibitor is associated with modulation of T cell-mediated immune responses
Source: PubMed Central journal article supplement (PMC4876390; doi:10.1038/srep26430), 2016-05-23
Supplement: srep26430-s1.pdf [file srep26430-s1.pdf]

# **Abrogation of collagen-induced arthritis by a peptidyl arginine deiminase inhibitor is associated with modulation of T cell-mediated immune responses**

Joanna Kawalkowska<sup>1\*</sup>, Anne-Marie Quirke<sup>1\*</sup>, Fatemeh Ghari<sup>2</sup>, Simon Davis<sup>4</sup>, Venkataraman Subramanian<sup>3</sup>, Paul R. Thompson<sup>3</sup>, Richard O. Williams<sup>1</sup>, Roman Fischer<sup>4</sup>, Nicholas B. La Thangue<sup>2</sup> and Patrick J. Venables<sup>1</sup>

<sup>1</sup>Kennedy Institute, Nuffield Department of Orthopaedics, Rheumatology & Musculoskeletal Sciences, University of Oxford, Roosevelt Drive, Oxford OX3 7FY, UK

<sup>2</sup>Laboratory of Cancer Biology, Department of Oncology, University of Oxford, Old Road Campus Research Building, Roosevelt Drive, Oxford OX3 7DQ, UK

<sup>3</sup>Biochemistry and Molecular Pharmacology, University of Massachusetts Medical School, LRB 826, 364 Plantation Street, Worcester, MA, 01605, USA

<sup>4</sup>Target Discovery Institute, Nuffield Department of Medicine, University of Oxford, Roosevelt Drive, Oxford OX3 7FZ, UK

\* Contributed equally to the study as joint first authors

# SUPPLEMENTARY FIGURE 1

**a**

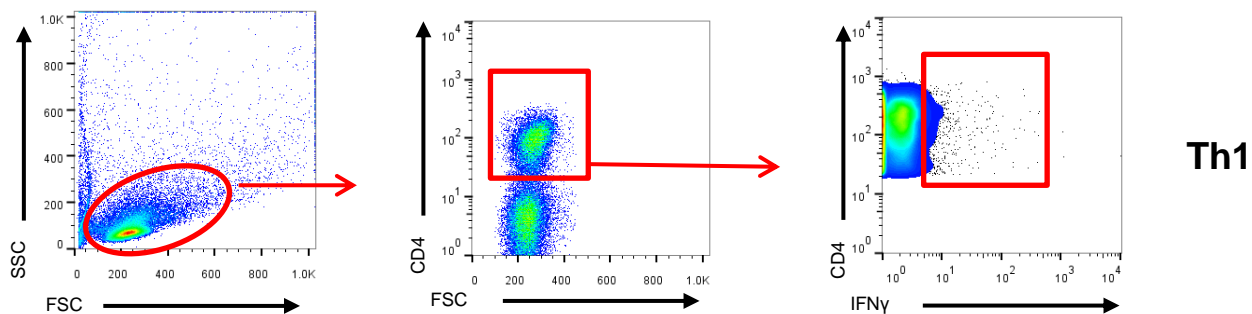

**b**

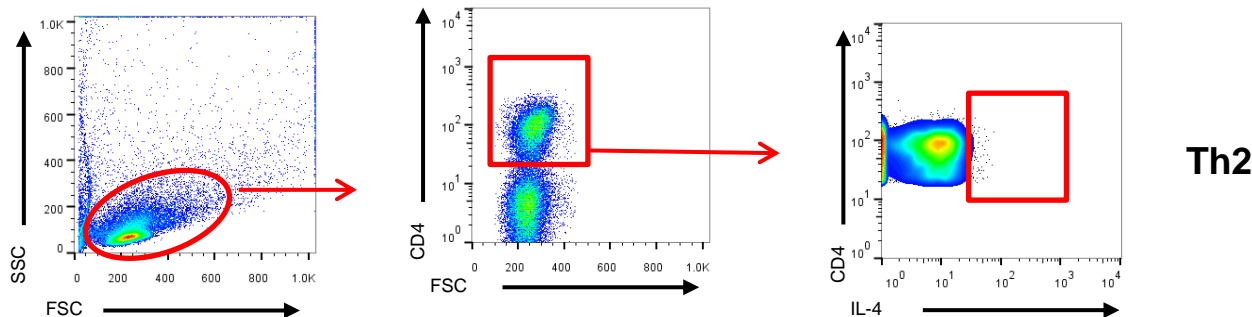

**c**

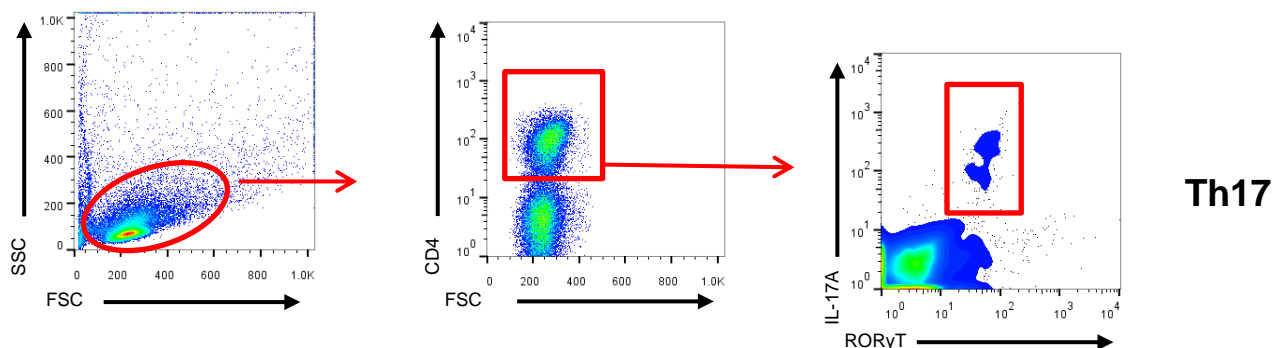

**d**

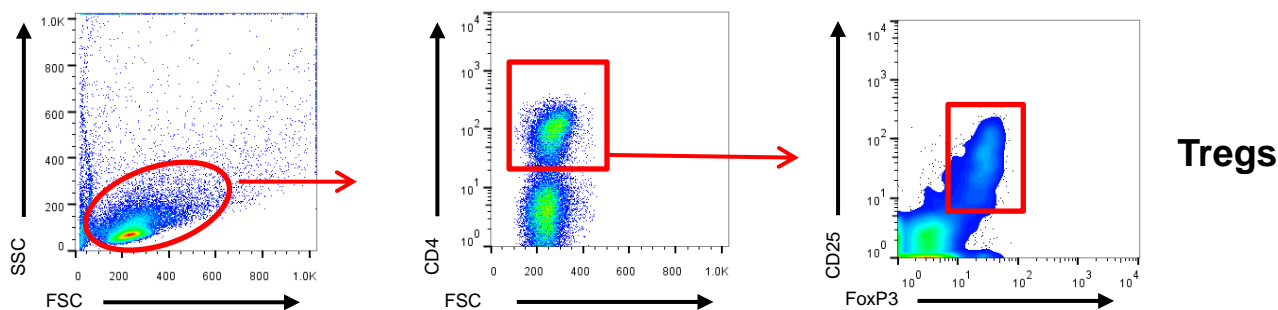

The gating strategies used in flow cytometry to identify CD4<sup>+</sup> T cell subpopulations in the lymph nodes of arthritic mice

(a-c) T helper subsets were identified with antibodies targeted against CD4 and IFN- $\gamma$  (Th1), IL-4 (Th2) or IL-17A (Th17). (d) Tregs were designated as CD4<sup>+</sup> CD25<sup>+</sup> FoxP3<sup>+</sup>.

**SUPPLEMENTARY TABLE 1**

Mass spectrometry analysis of citrulline residues in proteins isolated from the lymph nodes of mice with collagen-induced arthritis. The number of mice (out of 5-6 mice per group) which had citrulline detected in that protein is shown.

| <b>Protein</b>                                 | <b>Accession</b> | <b>Site</b> | <b>Vehicle</b> | <b>1 mg<br/>BB-Cl</b> | <b>10 mg<br/>BB-Cl</b> | <b>Naive</b> |
|------------------------------------------------|------------------|-------------|----------------|-----------------------|------------------------|--------------|
| Prothrombin                                    | H7BX99           | R490        | 3              | 2                     |                        |              |
| Actin, , cytoplasmic 1                         | P60710           | R290        | 2              | 1                     |                        |              |
| Elongation factor 1-alpha                      | P10126           | R266        | 2              | 1                     |                        |              |
| RNA demethylase ALKB5                          | Q3TSG4           | R287        | 2              |                       |                        |              |
| Histone H4                                     | P62806           | R93         | 1              | 1                     | 2                      |              |
| Histone H3.2                                   | P84228           | R117        | 1              | 1                     |                        |              |
| YLP motif containing protein                   | F6YTL8           | R579        | 1              | 2                     |                        |              |
| Actin-related protein 2                        | P61161           | R319        | 1              |                       |                        |              |
| 14-3-3 protein epsilon                         | P62259           | R19         | 1              |                       |                        |              |
| Gelsolin                                       | P13020           | R449        | 1              |                       |                        |              |
| Probable ATP-dependent RNA<br>helicase         | Q80Y44           | R478        | 1              |                       |                        |              |
| Keratin type 1 cytoskeletal17                  | Q9OWL7           | R410        | 1              |                       |                        |              |
| Myosin-9                                       | Q8VDD5           | R143        | 1              |                       |                        |              |
| Beta-globin                                    | A8DUK4           | R410        | 1              |                       |                        |              |
| Probable ATP-dependent RNA<br>helicase         | Q61656           | R2523       | 1              |                       |                        |              |
| Spondin-1                                      | Q8VCC9           | R93         | 1              |                       |                        |              |
| Acyl-CoA dehydrogenase 10                      | Q8K370           | R456        | 1              |                       |                        |              |
| Collagen alpha-1(VII)                          | Q63870           | R2523       |                | 1                     | 1                      |              |
| Tropomyosin alpha 3 chain                      | D3Z6I8           | R124        |                | 1                     |                        |              |
| Trifunctional enzyme subunit alpha             | Q8BMS1           | R610        |                | 1                     |                        |              |
| Fat1                                           | F2Z4A3           | R3775       |                | 1                     |                        |              |
| Fatty acid synthase                            | P19096           | R2019       |                | 1                     |                        |              |
| Histone deacetylase 1                          | O09106           | R229        |                | 1                     |                        |              |
| RNA demethylase ALKBH5                         | Q3TSG4           | R287        |                | 1                     |                        |              |
| Elongation factor 1-alpha                      | P10126           | R134        |                | 1                     |                        |              |
| Inter-alpha-trypsin inhibitor heavy<br>ITIH2   | P19823           | R341        |                | 1                     |                        |              |
| Inter-alpha-trypsin inhibitor heavy<br>ITIH3   | Q06033           | R70         |                | 1                     |                        |              |
| Heterogeneous nuclear<br>ribonuclearprotein A3 | Q8BG05           | R68         |                | 1                     |                        |              |
| Keratin, type2 cytoskeletal 1b                 | Q6IFZ6           | R342        |                | 1                     |                        |              |
| Keratin, type2 cytoskeletal 75                 | Q8BGZ7           | R239        |                | 1                     |                        |              |
| Beta-2-glycoprotein 1                          | Q01339           | R139        |                | 1                     |                        |              |
| Treacle protein                                | O08784           | R1068       |                |                       |                        | 1            |
| Serin/arginine-rich splicing factor 5          | O35326           | R48         |                |                       |                        | 1            |

## SUPPLEMENTARY TABLE 2

The antibodies used in flow cytometry to identify CD4<sup>+</sup> T cell subpopulations in the lymph nodes of arthritic mice and in T cell cultures

| <b>Antibody</b> | <b>Clone</b> | <b>Manufacturer</b> |
|-----------------|--------------|---------------------|
| CD4             | GK1.5        | eBioscience         |
| CD25            | PC61.5       | eBioscience         |
| IL-17A          | eBio117B7    | eBioscience         |
| ROR $\gamma$ T  | Q31-378      | BD Biosciences      |
| IFN- $\gamma$   | XMG1.2       | eBioscience         |
| IL-4            | 11B11        | eBioscience         |
| FoxP3           | FJK-16s      | eBioscience         |
| GATA3           | TWAJ         | eBioscience         |
